# Supplementary material for: Deep Neural Networks Rival the Representation of Primate IT Cortex for Core Visual Object Recognition
Source: PubMed Central journal article supplement (PMC4270441; doi:10.1371/journal.pcbi.1003963), 2014-12-18

A

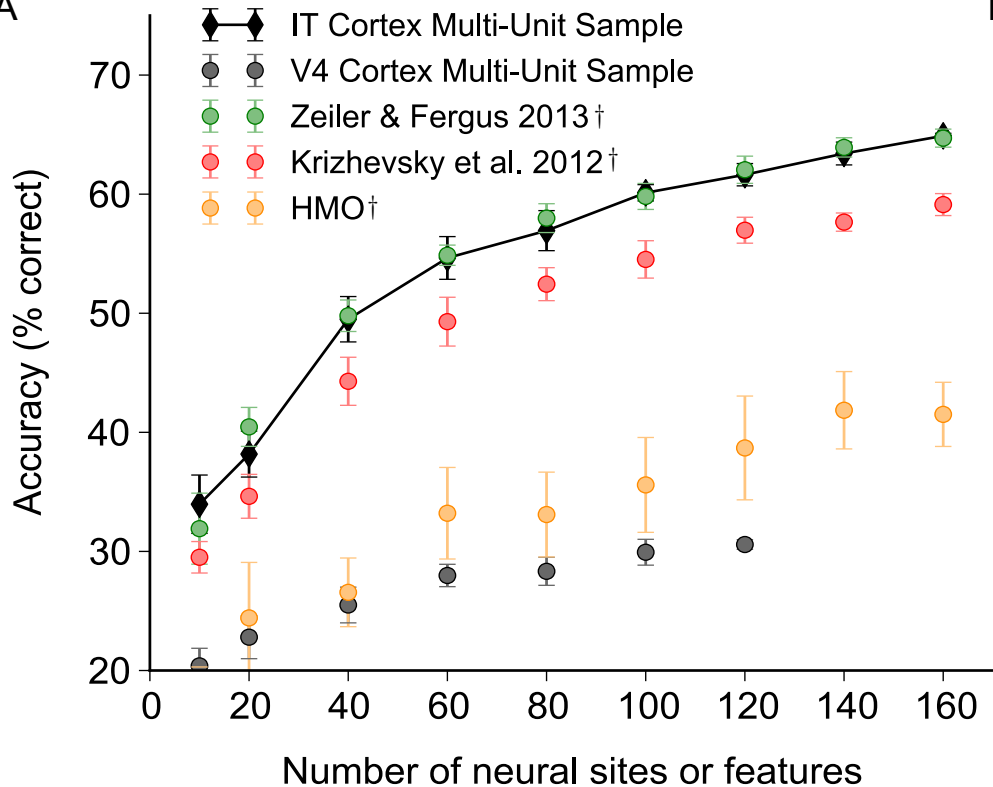

B

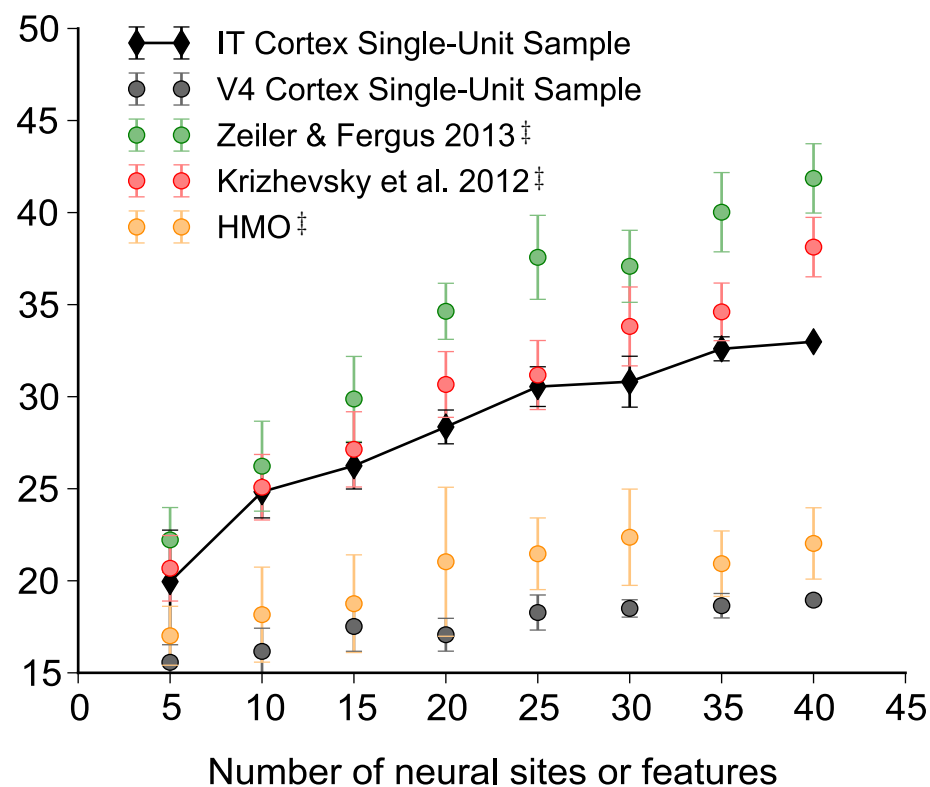

Supplement: pcbi.1003963.s004.pdf [file pcbi.1003963.s004.pdf]
